# Supplementary material
Source: PubMed Central journal article supplement (PMC10578070)
Supplement: NIHMS1922647-supplement-jz-2020-02421f_SI_2.pdf [file NIHMS1922647-supplement-jz-2020-02421f_SI_2.pdf]

## Supporting Information for

# Discovery of COVID-19 Inhibitors Targeting the SARS-CoV2 Nsp13 Helicase

*Mark Andrew White*<sup>1,2\*</sup>, *Wei Lin*<sup>3,4</sup>, and *Xiaodong Cheng*<sup>3,4\*</sup>

<sup>1</sup>Sealy Center for Structural Biology and Molecular Biophysics, The University of Texas Medical Branch, Galveston, TX 77555, USA

<sup>2</sup>Department of Biochemistry and Molecular Biology, The University of Texas Medical Branch, Galveston, TX 77555, USA

<sup>3</sup>Department of Integrative Biology & Pharmacology, University of Texas Health Science Center at Houston, Houston, TX 77030, USA

<sup>4</sup>Texas Therapeutics Institute, Institute of Molecular Medicine, University of Texas Health Science Center at Houston, Houston, TX 77030, USA

\*Correspondence should be addressed: [mawhite@utmb.edu](mailto:mawhite@utmb.edu); Tel.: 409-747-4747 or [Xiaodong.cheng@uth.tmc.edu](mailto:Xiaodong.cheng@uth.tmc.edu); Tel.: 713-500-7487

**Table S1. Comparison of Available Nsp13 Models/Templates.**

|                                           | <b>SARS</b>     | <b>MERS</b>      | <b>Sc Upf1</b>      |
|-------------------------------------------|-----------------|------------------|---------------------|
| PDB id                                    | 6JYT            | 5WWP             | 2XZL                |
| <b>Resolution (Å)</b>                     | 2.8             | 3.0              | 2.4                 |
| <b>Model(A) CC</b>                        | 0.85            | 0.89             | 0.90                |
| <b>RC outliers (%)</b>                    | 5.0             | 0.9              | 0.4                 |
| <b>Rotomer Outliers (%)</b>               | 0.8             | 4.7              | 1.4                 |
| <b>Walker-A Site</b>                      | Empty?          | (2) SO4          | ADP-Al <sub>4</sub> |
| <b>Cis-Peptides (%)<sup>1</sup></b>       | 0.80            | 0.48             | 0                   |
| <b>Clash-score</b>                        | 29              | 15               | 8                   |
| <b>#RSRZ&gt;2 Percentile</b>              | 1 <sup>st</sup> | 82 <sup>nd</sup> | 84 <sup>th</sup>    |
| <b>By-Chain C<math>\alpha</math>-RMSD</b> | <b>A / B</b>    | <b>A / B</b>     | <b>Sc Upf1</b>      |
| <b>S1A (Å)</b>                            | 0 / 1.18        | 1.83 / 1.73      | 24                  |
| <b>S1A<sup>2</sup> (Å)</b>                | 0 / 1.28        | 1.77 / 1.70      | 21                  |
| <b>S1A-CH (Å)</b>                         | 0 / 0.34        | 0.88 / 0.38      | 5                   |
| <b>S1A-Stalk (Å)</b>                      | 0 / 0.19        | 0.38 / 0.38      | 5                   |
| <b>S1A-1B (Å)</b>                         | 0 / 0.65        | na /             | 21                  |
| <b>S1A-Rec1A<sup>3</sup> (Å)</b>          | 0 / 0.63        | 0.63 / 0.64      | 11                  |
| <b>S1A-Rec2A (Å)</b>                      | 0 / 1.81        | 1.61 / 1.43      | 11                  |
| <b>M1B (Å)</b>                            | 1.73 / 1.66     | 1.38 / 0         | 22                  |
| <b>M1B<sup>2</sup> (Å)</b>                | 1.70 / 1.55     | 0.98 / 0         | 18                  |
| <b>M1B-CH (Å)</b>                         | 0.74 / 0.81     | 0.58 / 0         | 8                   |
| <b>M1B-Stalk (Å)</b>                      | 0.38 / 0.39     | 0.50 / 0         | 10                  |
| <b>M1B-1B (Å)</b>                         | 1.24 / 1.43     | na / 0           | 8                   |
| <b>M1B-Rec1A<sup>3</sup> (Å)</b>          | 0.64 / 0.77     | 0.43 / 0         | 14                  |
| <b>M1B-Rec2A (Å)</b>                      | 1.43 / 1.39     | 1.65 / 0         | 4                   |

<sup>1</sup> Number of non-proline Cis-peptides. <sup>2</sup> Excluding CH Zn-binding domain. <sup>3</sup> Excluding the 333-353 loop which interacts with domain 1B.

**Table S2. The C $\alpha$ -RMSD ( $\text{\AA}$ ) values for the four apo-SARS-CoV2 Nsp13 models.**

| Nom\Template         | SARS_2A | SARS_2B | MERS_2A | MERS_2B |
|----------------------|---------|---------|---------|---------|
| S2A ( $\text{\AA}$ ) | 0       | 0.74    | 1.88    | 1.67    |
| S2B ( $\text{\AA}$ ) | 0.74    | 0       | 1.90    | 1.71    |
| M2A ( $\text{\AA}$ ) | 1.88    | 1.90    | 0       | 1.61    |
| M2B ( $\text{\AA}$ ) | 1.67    | 1.71    | 1.61    | 0       |

The SARS\_CoV Nsp13 (6JYT) chains A and B templates were used to create models S2A and S2B respectively. The MERS\_CoV Nsp13 (5WWP) chains A and B templates were used to create models M2A and M2B respectively.

**Table S3. The Molprobit Validation of Models.**

|                                             | S2A        | S2B        | M2A         | M2B        | S2C        |
|---------------------------------------------|------------|------------|-------------|------------|------------|
| <b>Resolution (<math>\text{\AA}</math>)</b> | 2.8        | 2.8        | 3.0/MD      | 3.0/MD     | MD         |
| <b>MP Score (%ile)</b>                      | 2.38 (54%) | 2.11 (69%) | 1.92 (80%)  | 2.04 (73%) | 1.96 (78%) |
| <b>Clash Score (%ile)</b>                   | 58.2 (2%)  | 43.3 (6%)  | 22.07 (18%) | 36.53 (9%) | 1.51 (99%) |
| <b>RMS Bonds (<math>\text{\AA}</math>)</b>  | 0.016      | 0.020      | 0.015       | 0.017      | 0.035      |
| <b>Ramachandran</b>                         |            |            |             |            |            |
| <b>Favoured</b>                             | 97.3%      | 98.8%      | 99.2%       | 99.8%      | 90.1%      |
| <b>Allowed</b>                              | 2.4%       | 1.2%       | 0.8%        | 0.2%       | 7.6%       |
| <b>Outliers</b>                             | 0.3%       | 0.0%       | 0.0%        | 0.0%       | 2.3%       |
| <b>Rotamer Outliers</b>                     | 0.2%       | 0.4%       | 0.0%        | 0.0%       | 5.0%       |
| <b>C<math>\beta</math>-Deviations</b>       | 1.6%       | 1.6%       | 0.6%        | 0.9%       | 11.6%      |

**Table S5. The Top-Twenty Drug Hits for each SARS-CoV2 Nsp13 model.\***

| NN | (apo) | DRUG Name         | (S2A) | DRUG Name         | (S2B) | DRUG Name         | (M2A) | DRUG Name     | (M2B) | DRUG Name             | (ATP) | DRUG Name         |
|----|-------|-------------------|-------|-------------------|-------|-------------------|-------|---------------|-------|-----------------------|-------|-------------------|
| 1  | -10.3 | Cepharanthine     | -10.3 | Cepharanthine     | -10.1 | Dihydroergotamine | -10.2 | Cefoperazone  | -9.2  | Ledipasvir            | -11.1 | Lumacaftor        |
| 2  | -10.2 | Cefoperazone      | -10   | Ergoloid          | -10   | Ergotamine        | -10   | Cefpiramide   | -9.1  | Idarubicin            | -10.6 | Emend             |
| 3  | -10.1 | Dihydroergotamine | -10   | Ergotamine        | -10   | Netupitant        | -9.9  | Dpnh          | -9    | Daunorubicin          | -10.5 | Nilotinib         |
| 4  | -10   | Cefpiramide       | -9.9  | Dihydroergotamine | -9.9  | Ergoloid          | -9.9  | Lifitegrast   | -9    | Dpnh                  | -10.4 | Irinotecan        |
| 5  | -10   | Ergoloid          | -9.7  | Irinotecan        | -9.9  | Nilotinib         | -9.8  | Raltegravir   | -8.9  | <i>Carindacillin</i>  | -10.3 | Enjuvia           |
| 6  | -10   | Ergotamine        | -9.7  | Nilotinib         | -9.9  | Tubocurarin       | -9.7  | Daunorubicin  | -8.8  | <i>Cefonid</i>        | -10.1 | Zelboraf          |
| 7  | -10   | Netupitant        | -9.7  | Vumon             | -9.8  | Idarubicin        | -9.6  | Avodart       | -8.8  | <i>Cefpiramide</i>    | -10   | Cromolyn          |
| 8  | -9.9  | Dpnh              | -9.6  | Conivaptan        | -9.8  | Oxytetracycline   | -9.6  | Idarubicin    | -8.8  | <i>Diosmin</i>        | -10   | Diosmin           |
| 9  | -9.9  | Lifitegrast       | -9.6  | Fosaprepitant     | -9.7  | Dihydroergotoxine | -9.6  | Nilotinib     | -8.8  | <i>Rutin</i>          | -9.9  | Differin          |
| 10 | -9.9  | Nilotinib         | -9.4  | Biosone           | -9.7  | Dpnh              | -9.5  | Carindacillin | -8.7  | <i>Azelnidipine</i>   | -9.9  | Risperdal         |
| 11 | -9.9  | Tubocurarin       | -9.4  | Ceftobiprole      | -9.7  | Metocurine        | -9.5  | Valrubicin    | -8.7  | <i>Carindacillin</i>  | -9.9  | Rutin             |
| 12 | -9.8  | Idarubicin        | -9.4  | Venetoclax        | -9.7  | Otc               | -9.4  | Delamanid     | -8.7  | <i>Demeclocycline</i> | -9.9  | Valrubicin        |
| 13 | -9.8  | Oxytetracycline   | -9.3  | Ponatinib         | -9.7  | Venetoclax        | -9.4  | Ellence       | -8.7  | <i>Lumacaftor</i>     | -9.8  | Pemetrexed        |
| 14 | -9.8  | Raltegravir       | -9.2  | Avodart           | -9.6  | Daunorubicin      | -9.4  | Exjade        | -8.7  | <i>Meclocycline</i>   | -9.7  | Dihydroergotamine |
| 15 | -9.7  | Daunorubicin      | -9.2  | Biosone           | -9.6  | Doxycycline       | -9.4  | Fosaprepitant | -8.6  | <i>Cefoperazone</i>   | -9.7  | Ergotamine        |
| 16 | -9.7  | Dihydroergotoxine | -9.2  | Bromocriptine     | -9.6  | Imatinib          | -9.3  | Carindacillin | -8.6  | <i>Doxycycline</i>    | -9.7  | Idarubicin        |
| 17 | -9.7  | Irinotecan        | -9.2  | Cialis            | -9.6  | Lumacaftor        | -9.3  | Ceftobiprole  | -8.6  | <i>Methacycline</i>   | -9.7  | Lifitegrast       |
| 18 | -9.7  | Metocurine        | -9.2  | Rutin             | -9.6  | Meclocycline      | -9.3  | Dolutegravir  | -8.6  | <i>Raltegravir</i>    | -9.6  | Amaryl            |
| 19 | -9.7  | Otc               | -9.2  | Saquinavir        | -9.6  | Methacycline      | -9.3  | Doxorubicin   | -8.6  | <i>Sultamicillin</i>  | -9.6  | Avodart           |
| 20 | -9.7  | Venetoclax        | -9.2  | Tasosartan        | -9.5  | Biosone           | -9.3  | Erismodegib   | -8.6  | <i>Tasosartan</i>     | -9.6  | Ellence           |

\*The (apo) column is the highest scoring hit for any of the apo-ATP sites. The SARS\_CoV Nsp13 (6JYT) chains A and B templates were used to create models S2A and S2B respectively. The MERS\_CoV Nsp13 (5WWP) chains A and B templates were used to create models M2A and M2B respectively. The apo-Nsp13 ATP sites were selected as targets. The Upf1 guided Nsp13:ATP:ssRNA (S2C) complex ATP site was targeted. Dpnh: Dihydronicotinamide Adenine Dinucleotide Disodium Salt Hydrate (NADH). Cardinacillin is in the database as different stereoisomers (+/-). Otc: an isomer of oxytetracycline. The Vina docking scores are given in the column preceding the drug name. The column header specifies the target.

**Table S6. The Ligand-Protein interacting Pairs of Figures 3 & 4**

| Residue |     |    | ATP  | Cepharanthine | Idarubicin | Nilotinib | Lumacaftor | Emend | Zelborafor | Cromolyn | Risperdal |
|---------|-----|----|------|---------------|------------|-----------|------------|-------|------------|----------|-----------|
| Ser     | 264 | Og | .    | .             | .          | .         | .          | .     | .          | .        | -3.0      |
| Asn     | 265 | Nd | .    | .             | .          | .         | -3.3       | .     | .          | -3.2     | .         |
| Gly     | 285 | N  | -2.8 | .             | .          | .         | -3.1       | -3.3  | .          | -3.2     | .         |
| Gly     | 285 | O  | .    | .             | .          | .         | .          | .     | .          | .        | -3.3      |
| Thr     | 286 | N  | -2.9 | .             | .          | 3.1       | .          | .     | .          | -3.0     | .         |
| Thr     | 286 | O  | .    | .             | .          | .         | -3.4       | .     | .          | -3.5     | .         |
| Gly     | 287 | N  | -3.2 | -3.2          | .          | 3.0       | .          | .     | .          | -3.0     | .         |
| Gly     | 287 | N  | -3.3 | -3.1          | .          | .         | .          | .     | .          | .        | .         |
| Lys     | 288 | N  | -3.1 | .             | .          | .         | .          | .     | .          | -3.1     | .         |
| Ser     | 289 | N  | -3.1 | .             | .          | .         | -3.1       | .     | -2.9       | -2.8     | .         |
| Ser     | 289 | Og | .    | .             | -3.0       | .         | .          | .     | .          | .        | .         |
| Ser     | 289 | Og | .    | .             | -3.2       | .         | .          | .     | .          | .        | .         |
| His     | 290 | N  | -2.7 | .             | .          | .         | .          | .     | -3.1       | .        | .         |
| His     | 290 | Nd | -3.4 | .             | .          | .         | -3.2       | -3.1  | .          | .        | .         |
| Lys     | 320 | Nz | -2.6 | .             | -2.7       | .         | .          | .     | -3.0       | .        | .         |
| Glu     | 375 | Oe | .    | .             | -2.8       | .         | .          | .     | .          | .        | .         |
| Asp     | 374 | Od | -3.2 | .             | 3.3        | .         | .          | 3.0   | .          | -3.2     | .         |
| Asp     | 374 | Od | -3.1 | .             | -3.0       | .         | .          | -3.5  | .          | .        | .         |
| Lys     | 465 | Nz | -3.3 | .             | -2.7       | .         | .          | .     | .          | .        | .         |
| Arg     | 442 | Ne | .    | .             | .          | .         | .          | .     | .          | -3.1     | .         |
| Arg     | 442 | Nz | .    | .             | .          | .         | -3.2       | .     | .          | .        | -3.2      |
| Arg     | 443 | Nz | -2.6 | .             | .          | .         | -3.0       | .     | -2.9       | .        | .         |
| Arg     | 443 | Nz | -3.1 | .             | .          | .         | .          | .     | .          | .        | .         |
| Gly     | 439 | N  | .    | .             | .          | .         | -3.5       | .     | .          | .        | .         |
| Gln     | 537 | Oe | -3.0 | .             | .          | .         | .          | .     | .          | .        | .         |
| Gln     | 537 | Ne | -2.9 | -3.2          | -3.0       | .         | .          | .     | .          | .        | .         |
| Gly     | 538 | N  | -3.1 | .             | -3.0       | .         | .          | .     | .          | .        | .         |
| Glu     | 540 | Oe | -2.9 | .             | .          | 3.2       | .          | .     | .          | .        | .         |
| Glu     | 540 | Oe | -3.2 | .             | .          | 3.3       | .          | .     | .          | .        | .         |
| Arg     | 567 | Nz | -3.1 | .             | -3.3       | .         | .          | .     | .          | .        | .         |
| Arg     | 567 | Nz | -3.1 | .             | .          | .         | .          | .     | .          | .        | .         |

Hydrogen bond Distances and ligand atom type - Oxygen, + Nitrogen. The Ligands are ATP, Cepharanthine, Idarubicin, Nilotinib, Lumacaftor, Emend, Zelboraf, Cromolyn, and Risperdal.

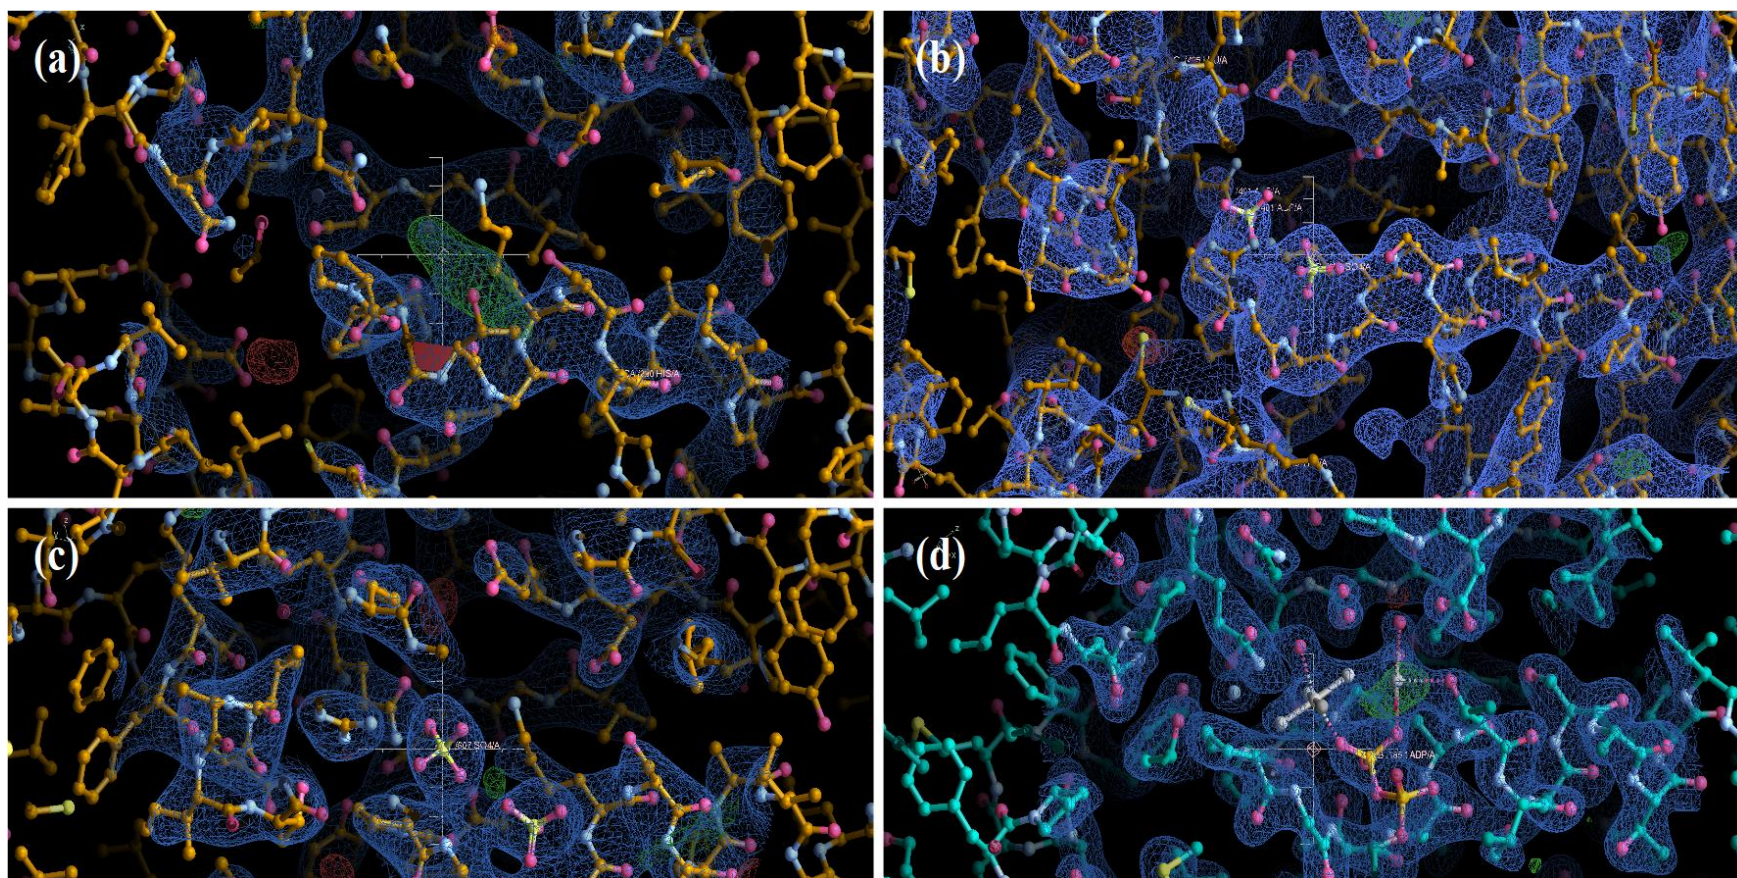

**Figure S1. The electron density of the Walker-A site in each structure.** (a) The SARS Nsp13 (6JYT) structure before and (b) after rebuilding the NTP site. (c) The MERS Nsp13 (5WWP) NTP binding site with two SO<sub>4</sub> ions. (d) The yeast Upf1 (2XZL) ADP-AIF<sub>4</sub> bound NTP site used as a template for the Nsp13 complex model.

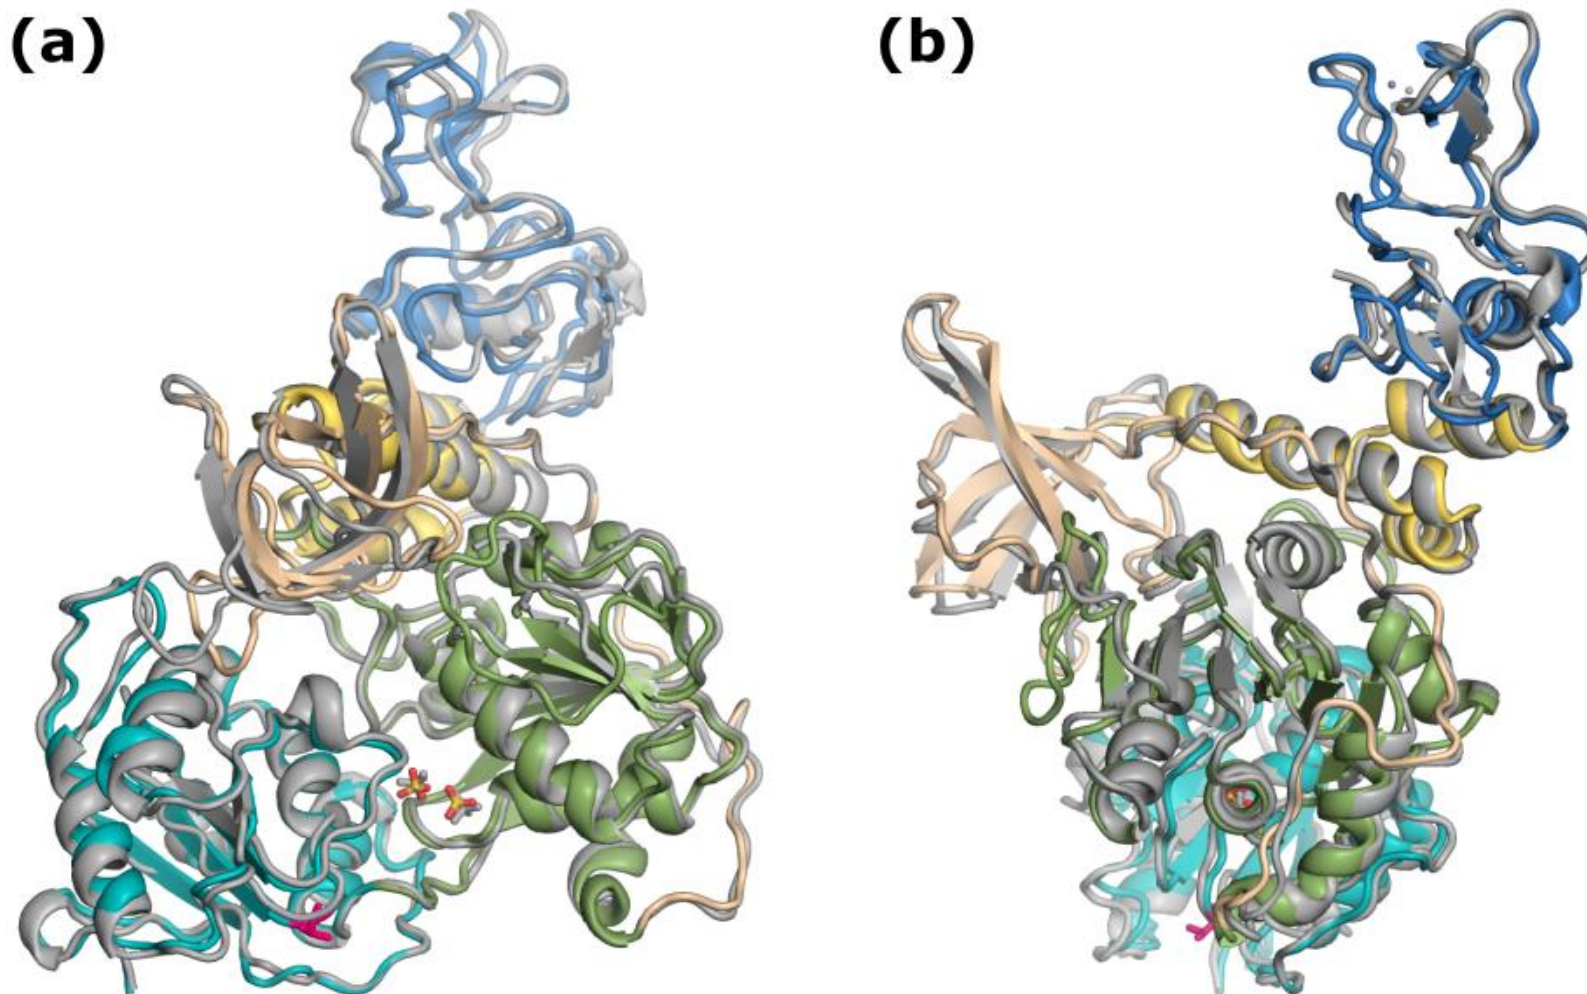

**Figure S2. Comparison of the apo-Nsp13 Models.** Superposition of the (M2B) apo-SARS-CoV2 Nsp13 homology model based on MERS Nsp13 helicase (5WWP), coloured-by-domain as in Figure 1, and the (S2A) apo-SARS-CoV2 Nsp13 structural model (grey) based on the SARS Nsp13 (6JYT) with the I570V mutation, show as red sticks. The two views (a and b) are rotated by 90° about the vertical. The Walker-A site is occupied by two SO<sub>4</sub> ions, lower center, in the apo crystal structures. See Figure S5 for superposition of other apo-Nsp13 models.

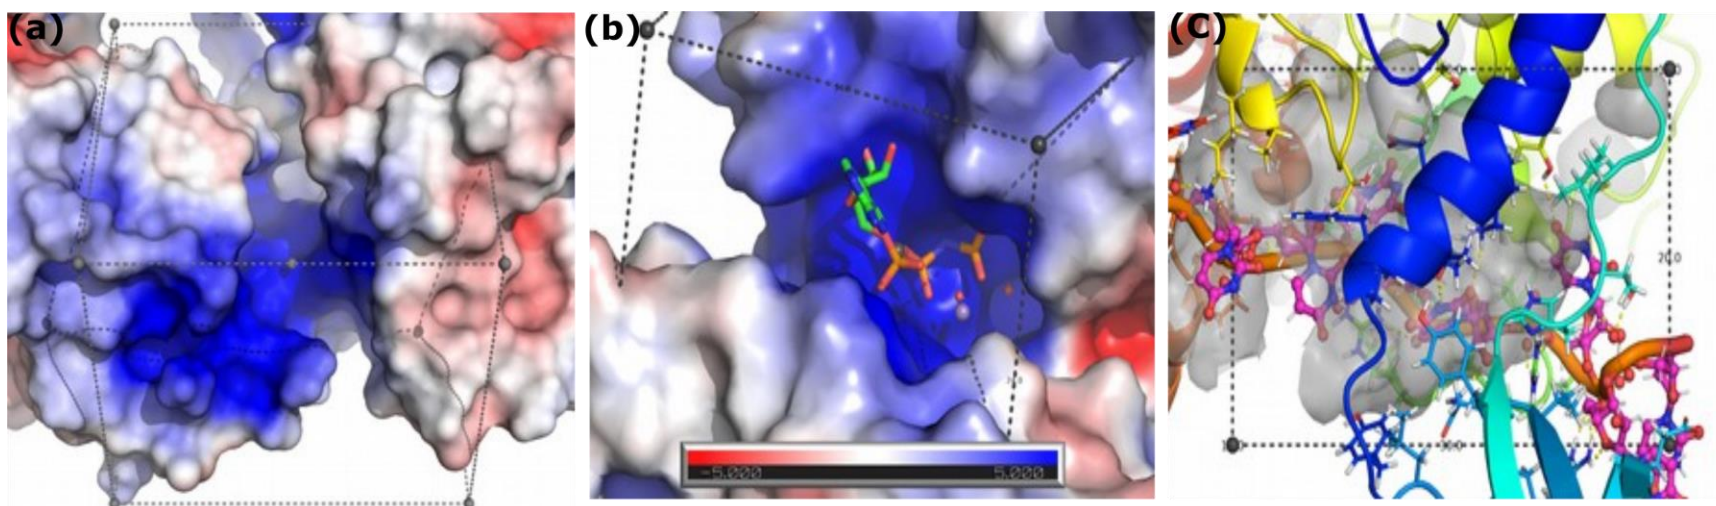

**Figure S3. SARS-CoV2 models' ATP-binding Site for HTvS.** Views of the (a) SARS-CoV (S2A), (b) MERS (M2B), and (c) Upf1 (S2C-ATP) based models of the SARS-CoV2 NTP binding site. ATP was modeled based on the Upf1 structure. The bounding box for AutoDockVina is shown as a dashed-line with gray spheres at each corner and the center.



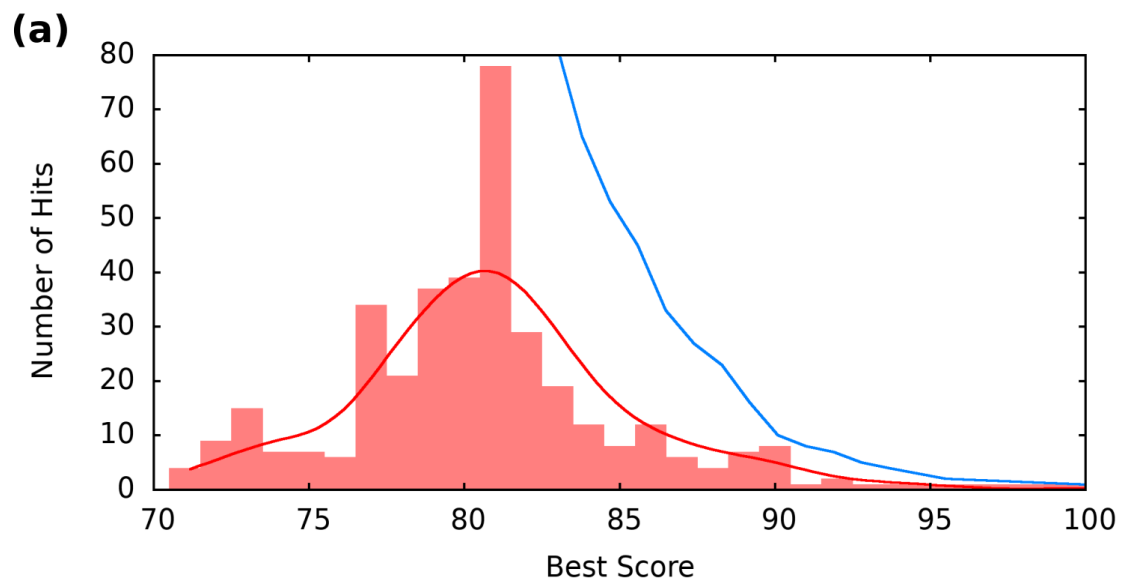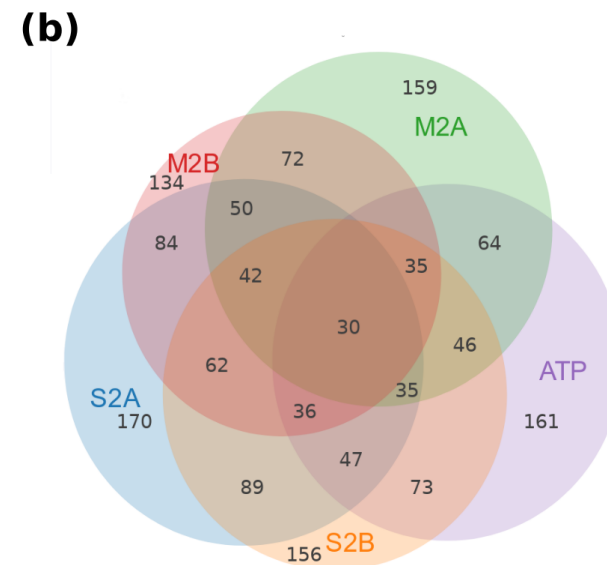

**Figure S4. Selected top hits.** (a) Histogram of the 369 drugs discovered using in-silico screening of the SARS-CoV2 Nsp13 helicase models (Table S4). The best score (x-axis) is the best normalized Vina docking score for any model, higher is better. The red line is the k-density smoothed distribution. The cut-off filtered results (blue line) is the cumulative number of drugs as the cut-off is lowered. (b) The Venn diagram of the ATP binding site hits for the five ATP templates. Each intersection has the hit count number.

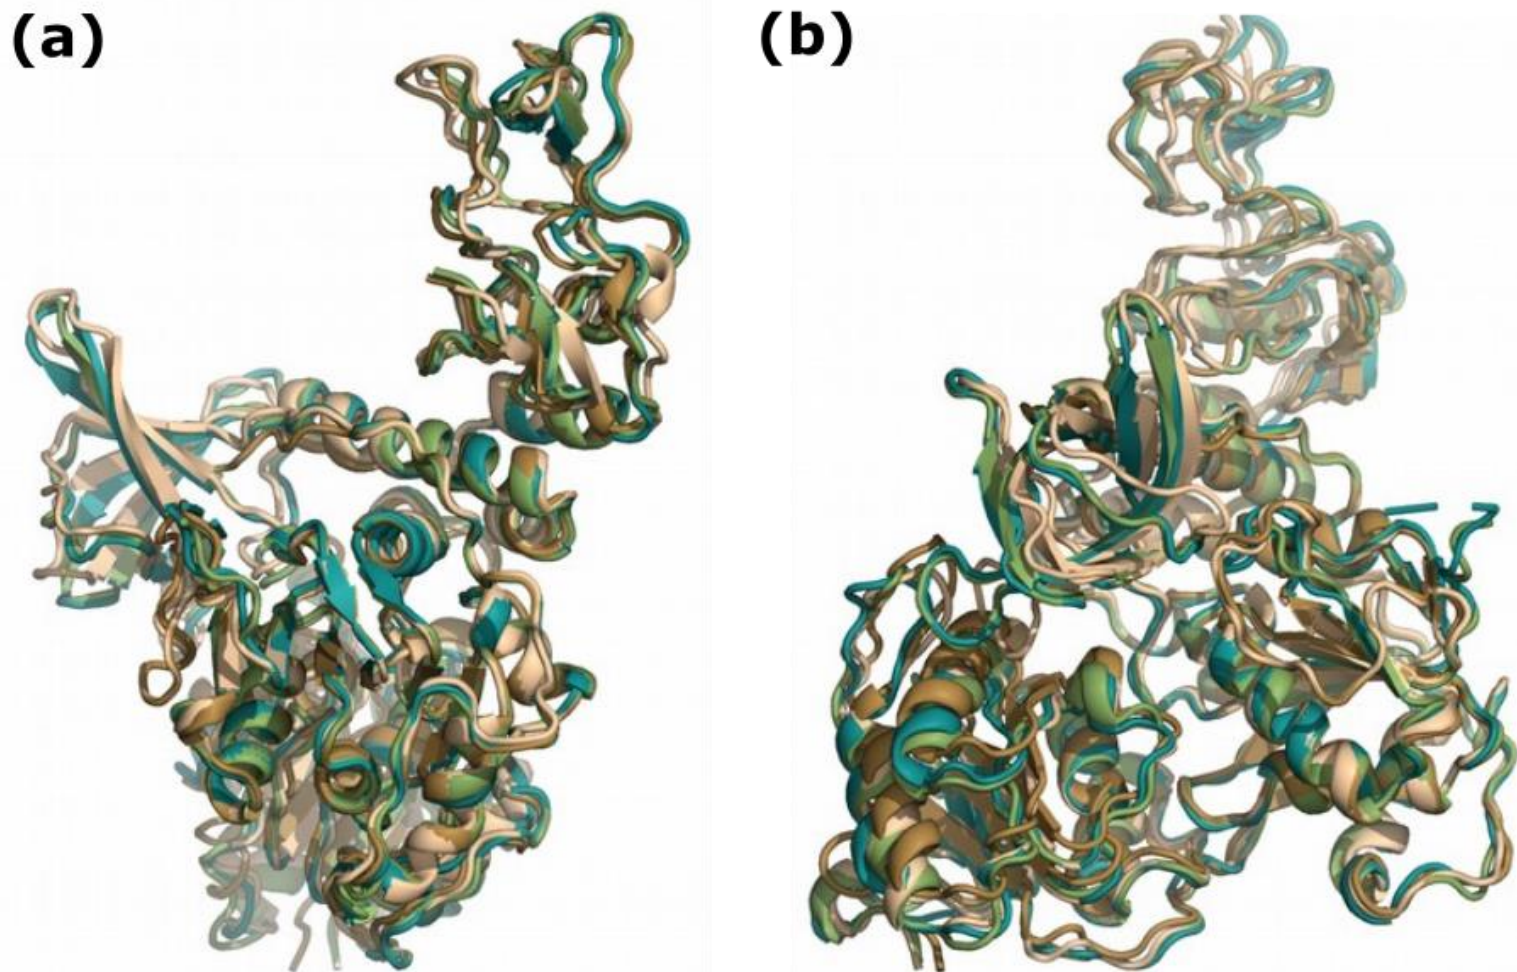

**Figure S5. Superposition of the four (apo) SARS-CoV2 Nsp13 homology models: S2A (cyan), S2B (green), M2A (brown), M2B (tan).** Inter-chain C $\alpha$ -RMSDs are 1.6 Å for MERS, and 0.74 Å for SARS. The inter-species model C $\alpha$ -RMSDs range from 1.7 to 1.9 Å (Table S-2). The two views (a and b) are rotated by 90° about the vertical.
